# Supplementary material for: Comparison of chitin‐induced natural transformation in pandemic Vibrio cholerae O1 El Tor strains
Source: PubMed Central journal article supplement (PMC7693049; doi:10.1111/1462-2920.15214), 2020-09-09
Supplement: EMI-22-4149-s001.pdf [file EMI-22-4149-s001.pdf]

# Supporting Information

## Comparison of chitin-induced natural transformation in pandemic *Vibrio cholerae* O1 El Tor strains

Sandrine Stutzmann and Melanie Blokesch

Supplementary figures

Table S1. Bacterial strains and plasmids

Table S2. Statistics on PacBio whole-genome sequencing data and assemblies

Table S3. Conservation of selected quorum sensing, chitin utilization, and competence gene products among pandemic *V. cholerae* strains

Supporting references

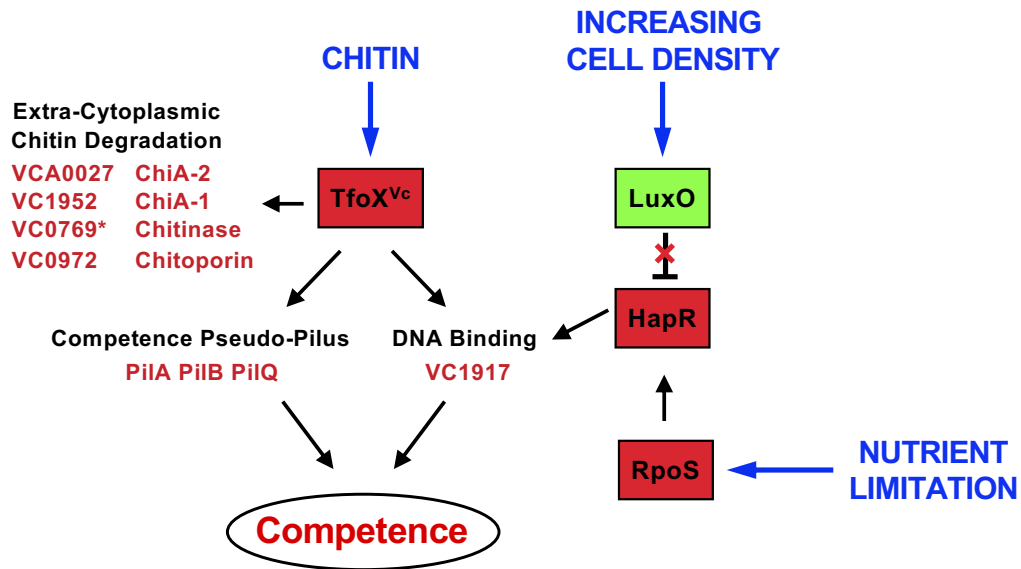

**Figure S1: Competence regulatory circuit in *V. cholerae* as proposed in 2005.** The model suggested three environmental variables as input: chitin, nutrient limitations, and increasing cell density. Red boxes denote positive regulators and regulated genes are shown in red writing. Freely adapted from Meibom *et al.*, 2005. \*, typo in original scheme (VC0679 instead of correct locus tag/gene VC0769).

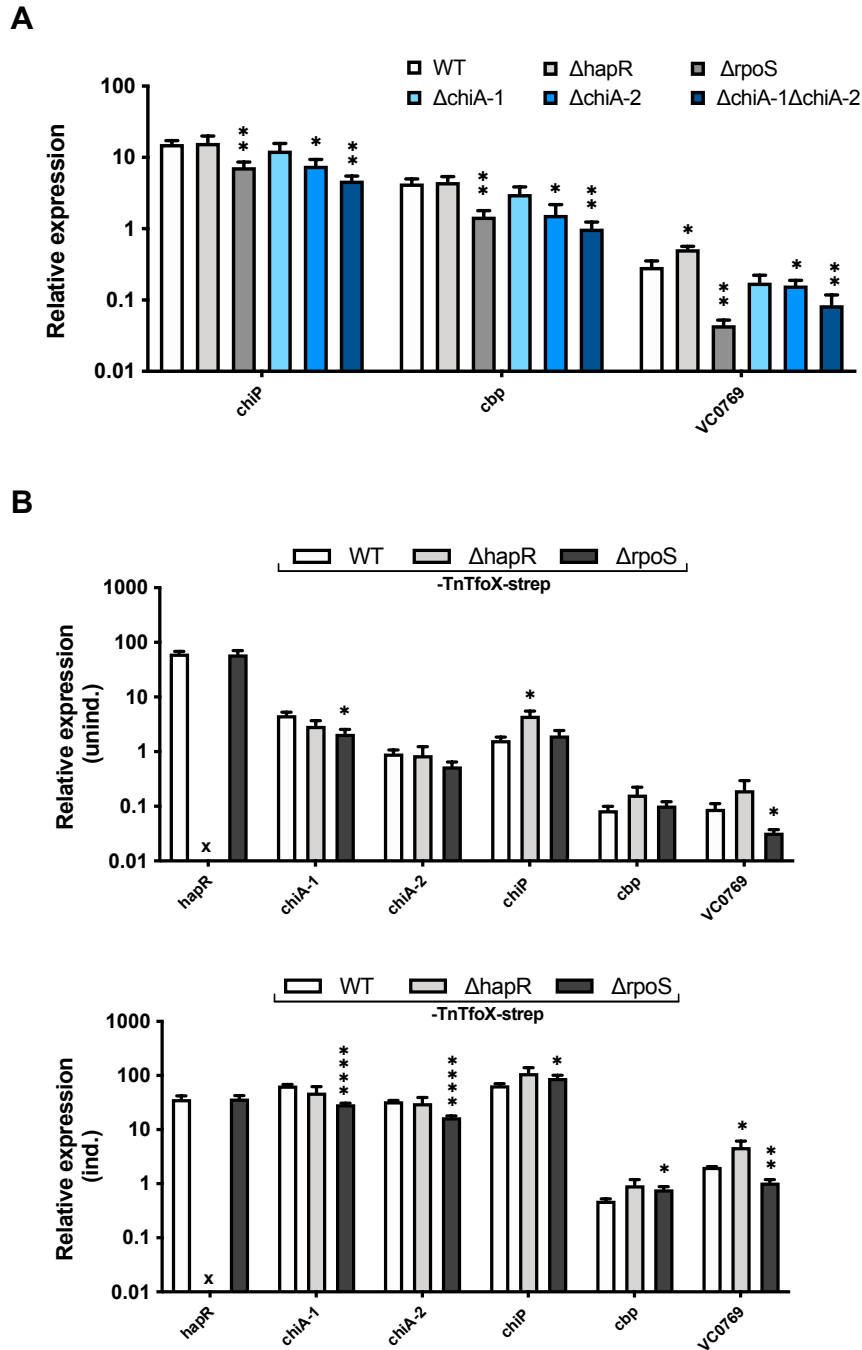

**Figure S2: RpoS-dependent chitin utilization gene expression.** Relative expression values for *V. cholerae* strains grown on chitin (A) or in rich medium without or with TfoX-induction (B). (A) Tested strains: WT (A1552) and its *hapR*-, *rpoS*-, *chiA-1*-, *chiA-2*-, and *chiA-1/chiA-2*-negative variants as indicated on top of the graph. Details as described for Fig. 4A. (B) WT,  $\Delta$ *hapR*, and  $\Delta$ *rpoS* strains carrying inducible *tfoX* on a transposon (TnTfoX-strep) were grown in the absence (uninduced; top graph) or presence (induced; lower graph) of the inducer arabinose (0.2% ara). Data in both panels are based on three independent biological replicates and show the average values ( $\pm$ SD). Statistical analyses on log-transformed data were performed to compare mutants to their WT parental strain using multiple *t* tests corrected for multiple comparisons using the Holm-Sidak method. \*  $p < 0.05$ ; \*\*  $p < 0.01$ ; \*\*\*,  $p < 0.001$ ; \*\*\*\*,  $p < 0.0001$ ; ns, not significant. x, not applicable as *hapR*-minus strain.

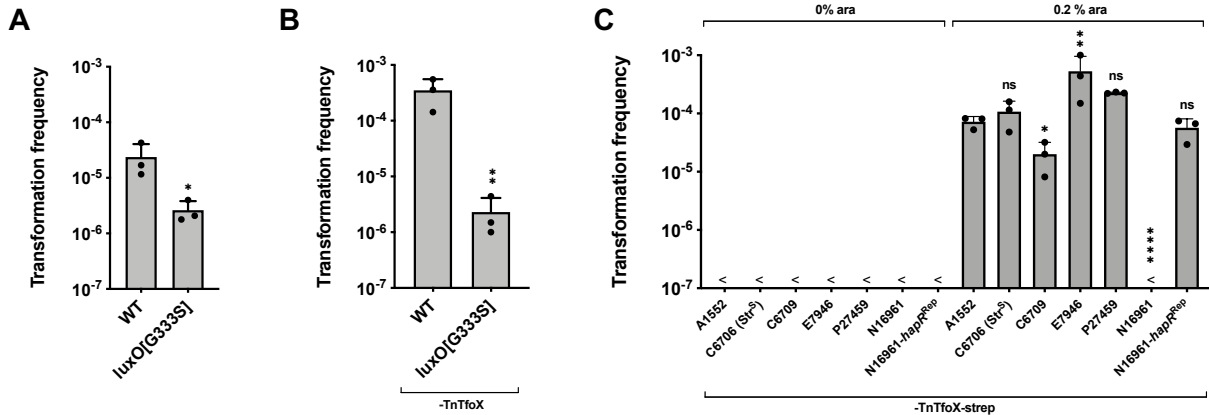

**Figure S3: Transformation defects in pandemic O1 *V. cholerae* strains.** Transformation frequencies were scored under (A) chitin- or (B and C) TfoX-dependent conditions. Details as in Fig. 2A and Fig. 3C for panels (A) and (B and C), respectively. For panel B, the two strains were grown in the presence of 0.02% ara. Data are based on three independent experiments and the bars show the average values ( $\pm$ SD). <, below detection limit. Statistical analyses were performed to compare the mutant or the different pandemic isolates to strain A1552 (in each category for panel C; e.g., 0% or 0.2% ara) using these tests: (A and B) Unpaired *t*-test; (C) one-way ANOVA with Sidak's multiple comparisons test. \*  $p < 0.05$ ; \*\*  $p < 0.01$ ; \*\*\*\*,  $p < 0.0001$ ; ns, not significant.

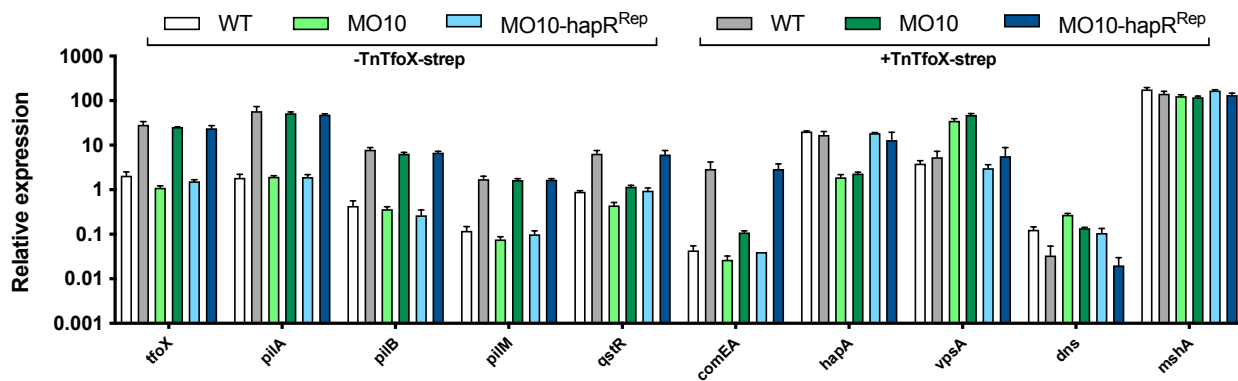

**Figure S4: Impaired competence gene expression in strain MO10.** The O1 strain A1552 and the O139 serogroup strain MO10 and its *hapR*-restored variant (MO10-*hapR*<sup>Rep</sup>) were grown in the presence of 0.02% ara. The strains carried no transposon (-TnTfoX-strep) or the *tfoX*-carrying transposon (+TnTfoX-strep). Transcript levels were scored by qRT-PCR. Relative expression levels are averages from three independent experiments ( $\pm$ SD) and shown on the Y-axis. The *mshA* gene served as a control for HapR- and TfoX-independent expression.

**Table S1. Bacterial strains and plasmids**

| Strains or plasmids              | Genotype/description*                                                                          | Internal strain number (accession #)                                               | Reference (original strain and genome sequence)                |
|----------------------------------|------------------------------------------------------------------------------------------------|------------------------------------------------------------------------------------|----------------------------------------------------------------|
| <i>V. cholerae</i>               |                                                                                                |                                                                                    |                                                                |
| A1552                            | Wild-type; O1 El Tor Inaba; Rif <sup>R</sup>                                                   | MB#1;<br>CP028894<br>CP028895<br>(Blokesh lab stock; Matthey <i>et al.</i> , 2018) | (Yildiz and Schoolnik, 1998)                                   |
| A1552-LacZ-Kan                   | A1552 strain with <i>aph</i> cassette in <i>lacZ</i> gene; Rif <sup>R</sup> , Kan <sup>R</sup> | MB#135                                                                             | (De Souza Silva and Blokesh, 2010)                             |
| A1552-LacZ-Cat                   | A1552 strain with <i>cat</i> cassette in <i>lacZ</i> gene; Rif <sup>R</sup> , Cm <sup>R</sup>  | MB#4608                                                                            | This study                                                     |
| Δ <i>cqsA</i>                    | A1552 with <i>cqsA</i> deleted (A1552ΔVCA0523); Rif <sup>R</sup>                               | MB#559                                                                             | (Suckow <i>et al.</i> , 2011)                                  |
| Δ <i>luxS</i>                    | A1552 with <i>luxS</i> deleted (A1552ΔVC0557); Rif <sup>R</sup>                                | MB#23                                                                              | (Nielsen <i>et al.</i> , 2006)                                 |
| Δ <i>luxS</i> Δ <i>cqsA</i>      | A1552 with <i>luxS</i> and <i>cqsA</i> deleted (A1552ΔVC0557ΔVCA0523); Rif <sup>R</sup>        | MB#602                                                                             | (Suckow <i>et al.</i> , 2011)                                  |
| Δ <i>hapR</i>                    | A1552 with <i>hapR</i> deleted (A1552ΔVC0583); Rif <sup>R</sup>                                | MB#3                                                                               | (Meibom <i>et al.</i> , 2005)                                  |
| C6706 (C6706str)                 | C6706str; El Tor biotype, O1; Str <sup>R</sup>                                                 | MB#4242                                                                            | (Antonova and Hammer, 2011); Hammer laboratory strain C6706str |
| C6706Δ <i>cqsA</i>               | C6706strΔ <i>cqsA</i> ; Str <sup>R</sup>                                                       | MB#4246                                                                            | (Antonova and Hammer, 2011); Hammer laboratory strain BH1523   |
| C6706Δ <i>luxS</i>               | C6706strΔ <i>luxS</i> ; Str <sup>R</sup>                                                       | MB#4248                                                                            | (Antonova and Hammer, 2011); Hammer laboratory strain BH1515   |
| C6706Δ <i>luxS</i> Δ <i>cqsA</i> | C6706strΔ <i>luxS</i> Δ <i>cqsA</i> ; Str <sup>R</sup>                                         | MB#4244                                                                            | (Antonova and Hammer, 2011); Hammer laboratory strain BH1575   |

|                                           |                                                                                                                                                                      |                                                                    |                                                                                           |
|-------------------------------------------|----------------------------------------------------------------------------------------------------------------------------------------------------------------------|--------------------------------------------------------------------|-------------------------------------------------------------------------------------------|
| C6706ΔhapR                                | C6706str ΔhapR; Str <sup>R</sup>                                                                                                                                     | MB#4252                                                            | (Antonova and Hammer, 2011); Hammer laboratory strain BH1543                              |
| ΔvqmA                                     | A1552 with <i>vqmA</i> deleted using TransFlp method (A1552ΔvqmA::FRT); Rif <sup>R</sup>                                                                             | MB#3809                                                            | This study                                                                                |
| <i>rpoS</i> :: <i>cm</i>                  | A1552 with <i>cat</i> cassette interrupting <i>rpoS</i> ; Rif <sup>R</sup> ; Cm <sup>R</sup>                                                                         | MB#7 (also #15 & #22)                                              | Laboratory stock; transferred from Schoolnik laboratory FY1; (Yildiz and Schoolnik, 1998) |
| <i>rpoS</i> :: <i>cm</i> -new             | A1552 naturally transformed with gDNA of strain <i>rpoS</i> :: <i>cm</i> ; Rif <sup>R</sup> , Cm <sup>R</sup>                                                        | MB#4984                                                            | This study                                                                                |
| Δ <i>rpoS</i>                             | A1552 with <i>rpoS</i> deleted using TransFlp method (A1552Δ <i>rpoS</i> ::FRT); Rif <sup>R</sup>                                                                    | MB#4486                                                            | This study                                                                                |
| Δ <i>chiA</i> -1                          | A1552 with <i>chiA</i> -1 deleted (A1552ΔVC1952); Rif <sup>R</sup>                                                                                                   | MB#350                                                             | (Meibom <i>et al.</i> , 2004)                                                             |
| Δ <i>chiA</i> -2                          | A1552 with <i>chiA</i> -2 deleted (A1552ΔVCA0027); Rif <sup>R</sup>                                                                                                  | MB#349                                                             | (Meibom <i>et al.</i> , 2004)                                                             |
| Δ <i>chiA</i> -1Δ <i>chiA</i> -2          | A1552 with <i>chiA</i> -1 and <i>chiA</i> -2 deleted (A1552ΔVC1952ΔVCA0027); Rif <sup>R</sup>                                                                        | MB#351                                                             | (Meibom <i>et al.</i> , 2004)                                                             |
| E7946                                     | E7946; Str <sup>R</sup>                                                                                                                                              | MB#5078                                                            | (Dalia, 2016); Dalia laboratory strain SAD030                                             |
| E7946Δ <i>chiA</i> -1<br>Δ <i>chiA</i> -2 | E7946 delta ChiA1, delta ChiA2; Str <sup>R</sup>                                                                                                                     | MB#5081                                                            | (Dalia, 2016); Dalia laboratory strain SAD863                                             |
| A1552-<br>luxO[G333S]-                    | A1552 with site-directed point mutation in <i>luxO</i> (resulting in LuxO[G333S]); Rif <sup>R</sup>                                                                  | MB#4492                                                            | This study                                                                                |
| A1552-<br>luxO[G333S]-<br><i>TntfoX</i>   | A1552-luxO[G333S] containing mini-Tn7- <i>araC</i> -P <sub>BAD</sub> - <i>tfoX</i> ; Rif <sup>R</sup> , Gent <sup>R</sup>                                            | MB# 5932                                                           | This study                                                                                |
| C6706 (Str <sup>S</sup> )                 | C6706; O1 El Tor Inaba; isolated in 1991, Peru; original isolate before introduction of streptomycin resistance mutation; non-mutated <i>luxO</i> ; Str <sup>S</sup> | MB#4522<br>CP047295<br>CP047296<br>(Blokesh lab stock; this study) | Gift from J. Mekalanos (Harvard); (Van der Henst <i>et al.</i> , 2018)                    |
| C6709                                     | C6709; O1 El Tor Inaba; isolated in 1991, Peru; Str <sup>R</sup>                                                                                                     | MB#1503<br>CP047297<br>CP047298                                    | Laboratory stock; (Wachsmuth <i>et al.</i> , 1993)                                        |

|                                                  |                                                                                                                                                       |                                                                                    |                                                         |
|--------------------------------------------------|-------------------------------------------------------------------------------------------------------------------------------------------------------|------------------------------------------------------------------------------------|---------------------------------------------------------|
|                                                  |                                                                                                                                                       | (Blokesch lab stock; this study)                                                   |                                                         |
| E7946                                            | E7946; O1 El Tor Ogawa; isolated in 1978, Bahrain; Str <sup>R</sup>                                                                                   | MB#2600<br>CP047303<br>CP047304<br>(Blokesch lab stock; this study)                | Laboratory stock;<br>(Miller <i>et al.</i> , 1989)      |
| P27459                                           | P27459; O1 El Tor Inaba; isolated in 1976, Bangladesh; Str <sup>R</sup>                                                                               | MB#1504<br>CP047299<br>CP047300<br>(Blokesch lab stock; this study)                | Laboratory stock;<br>(Pearson <i>et al.</i> , 1993)     |
| N16961                                           | N16961; O1 El Tor Inaba; isolated in 1975, Bangladesh; <i>hapR</i> frame-shift, Str <sup>R</sup>                                                      | MB#2<br>CP028827<br>CP028828<br>(Blokesch lab stock; Matthey <i>et al.</i> , 2018) | Laboratory stock;<br>(Heidelberg <i>et al.</i> , 2000)) |
| N16961- <i>hapR</i> <sup>Rep</sup>               | N16961 with repaired <i>hapR</i> frameshift mutation (scarless); Str <sup>R</sup>                                                                     | MB#5663                                                                            | (Van der Henst <i>et al.</i> , 2018)                    |
| A1552-TntfoX-strep                               | A1552 containing mini-Tn7- <i>araC</i> -P <sub>BAD</sub> - <i>tfoX-strep</i> ; Rif <sup>R</sup> , Gent <sup>R</sup>                                   | MB#3420                                                                            | (Metzger <i>et al.</i> , 2016)                          |
| C6706 (Str <sup>S</sup> ) - TntfoX-strep         | C6706 (previously named C6706-original) containing mini-Tn7- <i>araC</i> -P <sub>BAD</sub> - <i>tfoX-strep</i> ; Str <sup>S</sup> , Gent <sup>R</sup> | MB#4530                                                                            | This study                                              |
| C6709-TntfoX-strep                               | C6709 containing mini-Tn7- <i>araC</i> -P <sub>BAD</sub> - <i>tfoX-strep</i> ; Str <sup>R</sup> , Gent <sup>R</sup>                                   | MB#4156                                                                            | This study                                              |
| E7946-TntfoX-strep                               | E7946 containing mini-Tn7- <i>araC</i> -P <sub>BAD</sub> - <i>tfoX-strep</i> ; Str <sup>R</sup> , Gent <sup>R</sup>                                   | MB#4162                                                                            | This study                                              |
| P27459-TntfoX-strep                              | P27459 containing mini-Tn7- <i>araC</i> -P <sub>BAD</sub> - <i>tfoX-strep</i> ; Str <sup>R</sup> , Gent <sup>R</sup>                                  | MB#4158                                                                            | This study                                              |
| N16961-TntfoX-strep                              | N16961 containing mini-Tn7- <i>araC</i> -P <sub>BAD</sub> - <i>tfoX-strep</i> ; Str <sup>R</sup> , Gent <sup>R</sup>                                  | MB#4395                                                                            | This study                                              |
| N16961- <i>hapR</i> <sup>Rep</sup> -TntfoX-strep | N16961- <i>hapR</i> <sup>Rep</sup> containing mini-Tn7- <i>araC</i> -P <sub>BAD</sub> - <i>tfoX-strep</i> ; Str <sup>R</sup> , Gent <sup>R</sup>      | MB#5697                                                                            | This study                                              |
| MO10                                             | O139 strain; isolated in 1992, India; <i>hapR</i> mutated; Str <sup>R</sup>                                                                           | MB#5<br>CP060094<br>CP060095<br>(Blokesch lab stock; this study)                   | Laboratory stock;<br>(Waldor and Mekalanos, 1994)       |
| MO10- <i>hapR</i> <sup>Rep</sup>                 | MO10 with repaired <i>hapR</i> gene; Str <sup>R</sup>                                                                                                 | MB#5661                                                                            | (Adams <i>et al.</i> , 2019b)                           |
| MO10Δdns                                         | MO10 with <i>dns</i> deleted (ΔVC0470); Str <sup>R</sup>                                                                                              | MB#472                                                                             | This study                                              |



|                                                                    |                                                                                                                                                                     |         |                                  |
|--------------------------------------------------------------------|---------------------------------------------------------------------------------------------------------------------------------------------------------------------|---------|----------------------------------|
| MO10 $\Delta$ sxnA                                                 | MO10 with <i>sxnA</i> deleted (locus tag H6M50_12490 in sequence reported in this study or ORF s62 in AY055428.1; (Beaber <i>et al.</i> , 2002)); Str <sup>R</sup>  | MB#4868 | This study                       |
| MO10 $\Delta$ dns $\Delta$ sxnA                                    | MO10 with <i>dns</i> and <i>sxnA</i> deleted; Str <sup>R</sup>                                                                                                      | MB#4869 | This study                       |
| MO10- <i>hapR</i> <sup>Rep</sup> $\Delta$ dns                      | MO10- <i>hapR</i> <sup>Rep</sup> with <i>dns</i> deleted; Str <sup>R</sup>                                                                                          | MB#5767 | This study                       |
| MO10- <i>hapR</i> <sup>Rep</sup> $\Delta$ sxnA                     | MO10- <i>hapR</i> <sup>Rep</sup> with <i>sxnA</i> deleted; Str <sup>R</sup>                                                                                         | MB#5763 | This study                       |
| MO10- <i>hapR</i> <sup>Rep</sup> $\Delta$ dns $\Delta$ sxnA        | MO10- <i>hapR</i> <sup>Rep</sup> with <i>dns</i> and <i>sxnA</i> deleted; Str <sup>R</sup>                                                                          | MB#5799 | This study                       |
| A1552-TntfoX                                                       | A1552 containing mini-Tn7- <i>araC</i> -P <sub>BAD</sub> - <i>tfoX</i> ; Rif <sup>R</sup> , Gent <sup>R</sup>                                                       | MB#1626 | (Lo Scrudato and Blokesch, 2012) |
| MO10-TntfoX                                                        | MO10 containing mini-Tn7- <i>araC</i> -P <sub>BAD</sub> - <i>tfoX</i> ; Str <sup>R</sup> , Gent <sup>R</sup>                                                        | MB#5924 | (Adams <i>et al.</i> , 2019b)    |
| MO10- <i>hapR</i> <sup>Rep</sup> -TntfoX                           | MO10- <i>hapR</i> <sup>Rep</sup> containing mini-Tn7- <i>araC</i> -P <sub>BAD</sub> - <i>tfoX</i> ; Str <sup>R</sup> , Gent <sup>R</sup>                            | MB#5690 | (Adams <i>et al.</i> , 2019b)    |
| MO10 $\Delta$ dns-TntfoX                                           | MO10 $\Delta$ dns containing mini-Tn7- <i>araC</i> -P <sub>BAD</sub> - <i>tfoX</i> ; Str <sup>R</sup> , Gent <sup>R</sup>                                           | MB#5925 | This study                       |
| MO10 $\Delta$ sxnA-TntfoX                                          | MO10 $\Delta$ sxnA containing mini-Tn7- <i>araC</i> -P <sub>BAD</sub> - <i>tfoX</i> ; Str <sup>R</sup> , Gent <sup>R</sup>                                          | MB#5926 | This study                       |
| MO10 $\Delta$ dns $\Delta$ sxnA-TntfoX                             | MO10 $\Delta$ dns $\Delta$ sxnA containing mini-Tn7- <i>araC</i> -P <sub>BAD</sub> - <i>tfoX</i> ; Str <sup>R</sup> , Gent <sup>R</sup>                             | MB#5927 | This study                       |
| MO10- <i>hapR</i> <sup>Rep</sup> $\Delta$ dns-TntfoX               | MO10- <i>hapR</i> <sup>Rep</sup> $\Delta$ dns containing mini-Tn7- <i>araC</i> -P <sub>BAD</sub> - <i>tfoX</i> ; Str <sup>R</sup> , Gent <sup>R</sup>               | MB#5768 | This study                       |
| MO10- <i>hapR</i> <sup>Rep</sup> $\Delta$ sxnA-TntfoX              | MO10- <i>hapR</i> <sup>Rep</sup> $\Delta$ sxnA containing mini-Tn7- <i>araC</i> -P <sub>BAD</sub> - <i>tfoX</i> ; Str <sup>R</sup> , Gent <sup>R</sup>              | MB#5764 | This study                       |
| MO10- <i>hapR</i> <sup>Rep</sup> $\Delta$ dns $\Delta$ sxnA-TntfoX | MO10- <i>hapR</i> <sup>Rep</sup> $\Delta$ dns $\Delta$ sxnA containing mini-Tn7- <i>araC</i> -P <sub>BAD</sub> - <i>tfoX</i> ; Str <sup>R</sup> , Gent <sup>R</sup> | MB#5800 | This study                       |
| $\Delta$ comM                                                      | A1552 with <i>comM</i> deleted (VC0032); Rif <sup>R</sup>                                                                                                           | MB#381  | (Jaskólska <i>et al.</i> , 2018) |
| $\Delta$ VC0033                                                    | A1552 with <i>VC0033</i> deleted using TransFlp method (A1552 $\Delta$ VC0033::FRT); Rif <sup>R</sup>                                                               | MB#6127 | (Jaskólska <i>et al.</i> , 2018) |
| A1552-TnAraC                                                       | A1552 containing mini-Tn7- <i>araC</i> (TnAraC); Rif <sup>R</sup> , Gent <sup>R</sup>                                                                               | MB#8503 | This study                       |
| C6709-TnAraC                                                       | C6709 containing mini-Tn7- <i>araC</i> (TnAraC); Str <sup>R</sup> , Gent <sup>R</sup>                                                                               | MB#8504 | This study                       |
| $\Delta$ comM-TnAraC                                               | $\Delta$ comM containing mini-Tn7- <i>araC</i> (TnAraC); Rif <sup>R</sup> , Gent <sup>R</sup>                                                                       | MB#8505 | This study                       |
| $\Delta$ VC0033-TnAraC                                             | $\Delta$ VC0033 containing mini-Tn7- <i>araC</i> (TnAraC); Rif <sup>R</sup> , Gent <sup>R</sup>                                                                     | MB#8506 | This study                       |
| A1552-TnComM                                                       | A1552 containing mini-Tn7- <i>araC</i> - <i>comM</i> (TnComM); Rif <sup>R</sup> , Gent <sup>R</sup>                                                                 | MB#8507 | This study                       |
| C6709-TnComM                                                       | C6709 containing mini-Tn7- <i>araC</i> - <i>comM</i> (TnComM); Str <sup>R</sup> , Gent <sup>R</sup>                                                                 | MB#8508 | This study                       |
| $\Delta$ comM-TnComM                                               | $\Delta$ comM containing mini-Tn7- <i>araC</i> - <i>comM</i> (TnComM); Rif <sup>R</sup> , Gent <sup>R</sup>                                                         | MB#8509 | This study                       |
| $\Delta$ VC0033-TnComM                                             | $\Delta$ VC0033 containing mini-Tn7- <i>araC</i> - <i>comM</i> (TnComM); Rif <sup>R</sup> , Gent <sup>R</sup>                                                       | MB#8510 | This study                       |
| A1552-TnVC0033                                                     | A1552 containing mini-Tn7- <i>araC</i> - <i>VC0033</i> (TnVC0033); Rif <sup>R</sup> , Gent <sup>R</sup>                                                             | MB#8511 | This study                       |

|                        |                                                                                                                                                                                       |         |                                            |
|------------------------|---------------------------------------------------------------------------------------------------------------------------------------------------------------------------------------|---------|--------------------------------------------|
| C6709-TnVC0033         | C6709 containing mini-Tn7- <i>araC-VC0033</i> (TnVC0033); Str <sup>R</sup> , Gent <sup>R</sup>                                                                                        | MB#8512 | This study                                 |
| ΔcomM-TnVC0033         | ΔcomM containing mini-Tn7- <i>araC-VC0033</i> (TnVC0033); Rif <sup>R</sup> , Gent <sup>R</sup>                                                                                        | MB#8513 | This study                                 |
| ΔVC0033-TnVC0033       | ΔVC0033 containing mini-Tn7- <i>araC-VC0033</i> (TnVC0033); Rif <sup>R</sup> , Gent <sup>R</sup>                                                                                      | MB#8514 | This study                                 |
| <b><i>E. coli</i></b>  |                                                                                                                                                                                       |         |                                            |
| TOP10                  | F <sup>-</sup> mcrA Δ(mrr-hsdRMS-mcrBC) φ80lacZΔM15 ΔlacX74 nupG recA1 araΔ139 Δ(ara-leu)7697 galE15 galK16 rpsL(Str <sup>R</sup> ) endA1λ <sup>-</sup>                               | MB#741  | Invitrogen                                 |
| DH5α                   | F <sup>-</sup> endA1 glnV44 thi-1 recA1 relA1 gyrA96 deoR nupG φ80lacZΔM15 Δ(lacZYA-argF) U169 hsdR17 (r <sub>K</sub> <sup>-</sup> m <sub>K</sub> <sup>+</sup> ) phoA, λ <sup>-</sup> | MB#736  | (Yanisch-Perron <i>et al.</i> , 1985)      |
| SM10λpir               | thi-1 thr leu tonA lacY supE recA::RP4-2-Tc::Mu, Kmr (λpir); Kan <sup>R</sup>                                                                                                         | MB#647  | (Simon <i>et al.</i> , 1983)               |
| S17-1λpir              | Tpr Smr recA thi pro hsdR2M1 RP4:2-Tc:Mu:Kmr Tn7 (λpir); Str <sup>R</sup>                                                                                                             | MB#648  | (Simon <i>et al.</i> , 1983)               |
| <b><i>Plasmids</i></b> |                                                                                                                                                                                       |         |                                            |
| pGP704-Sac28           | suicide vector, ori R6K <i>sacB</i> ; Amp <sup>R</sup>                                                                                                                                | MB#649  | (Meibom <i>et al.</i> , 2004)              |
| pSac28ΔsxnA            | pSac28ΔH6M50 12490 (nuclease gene on SXT element of MO10); Amp <sup>R</sup>                                                                                                           | MB#4833 | This study                                 |
| pUX-BF-13              | <i>ori</i> R6K, helper plasmid with Tn7 transposition function; Amp <sup>R</sup>                                                                                                      | MB#457  | (Bao <i>et al.</i> , 1991)                 |
| pBR-flp                | FLP <sup>+</sup> , λ cI857 <sup>+</sup> , λ p <sub>R</sub> from pCP20 integrated into <i>EcoRV</i> site of pBR322                                                                     | MB#1203 | (De Souza Silva and Blokesch, 2010)        |
| pBR-FRT-Kan-FRT2       | pBR322 derivative containing improved FRT- <i>aph</i> -FRT cassette; used as template for TransFLP; Amp <sup>R</sup> , Kan <sup>R</sup>                                               | MB#3782 | (Metzger <i>et al.</i> , 2016)             |
| pBR-FRT-Cat-FRT2       | pBR322 derivative containing improved FRT- <i>cat</i> -FRT cassette; used as template for TransFLP; Amp <sup>R</sup> , Cm <sup>R</sup>                                                | MB#3783 | (Metzger <i>et al.</i> , 2016)             |
| pGP704-mTntfoX         | pGP704 with mini-Tn7 carrying <i>araC</i> and P <sub>BAD</sub> -driven <i>tfoX</i> ; Amp <sup>R</sup> , Gent <sup>R</sup>                                                             | MB#1624 | (Lo Scudato and Blokesch, 2012)            |
| pGP704-mTntfoX-strep   | pGP704 with mini-Tn7 carrying <i>araC</i> and P <sub>BAD</sub> -driven <i>tfoX-strep</i> ; Amp <sup>R</sup> , Gent <sup>R</sup>                                                       | MB#3664 | (Metzger <i>et al.</i> , 2016)             |
| pGP704-Tn              | pGP704 with mini-Tn7; Amp <sup>R</sup> , Gent <sup>R</sup>                                                                                                                            | MB#645  | (Müller <i>et al.</i> , 2007)              |
| pGP704-TnAraC          | pGP704 with mini-Tn7 carrying <i>araC</i> and P <sub>BAD</sub> ; Amp <sup>R</sup> , Gent <sup>R</sup>                                                                                 | MB#5513 | This study & (Adams <i>et al.</i> , 2019a) |
| pGP704-TnComM          | pGP704 with mini-Tn7 carrying <i>araC</i> and P <sub>BAD</sub> -driven <i>comM</i> ; Amp <sup>R</sup> , Gent <sup>R</sup>                                                             | MB#8500 | This study                                 |
| pGP704-TnVC0033        | pGP704 with mini-Tn7 carrying <i>araC</i> and P <sub>BAD</sub> -driven <i>VC0033</i> ; Amp <sup>R</sup> , Gent <sup>R</sup>                                                           | MB#8502 | This study                                 |

\* Locus tag numbers (VC.../VCA....) according to (Heidelberg *et al.*, 2000)

**Table S2. Statistics on PacBio whole-genome sequencing data and assemblies**

|                                                  | <b>C6706</b>                                | <b>C6709</b>                                 | <b>E7946</b>                                 | <b>P27459</b>                                | <b>MO10</b>                                  |
|--------------------------------------------------|---------------------------------------------|----------------------------------------------|----------------------------------------------|----------------------------------------------|----------------------------------------------|
| <b>Strain ID</b>                                 | MB#4522                                     | MB#1503                                      | MB#2600                                      | MB#1504                                      | MB#5                                         |
| <b>BioSample ID</b>                              | SAMN13734987                                | SAMN13734988                                 | SAMN13734989                                 | SAMN13734999                                 | SAMN15756141                                 |
| <b>GenBank accession numbers (chr 1 / chr 2)</b> | CP047295 /<br>CP047296                      | CP047297 /<br>CP047298                       | CP047303 /<br>CP047304                       | CP047299 /<br>CP047300                       | CP060094 /<br>CP060095                       |
| <b>Number of bases</b>                           | 1,908,280,912                               | 1,966,394,792                                | 2,120,148,521                                | 2,112,220,841                                | 741,322,034                                  |
| <b>Number of reads</b>                           | 107,132                                     | 113,782                                      | 118,563                                      | 118,978                                      | 117,801                                      |
| <b>Mean read length</b>                          | 17,812 bp                                   | 17,282 bp                                    | 17,882 bp                                    | 17,753 bp                                    | 34,264                                       |
| <b>Total number of contigs</b>                   | 2 (chr1+chr2)                               | 2 (chr1+chr2)                                | 2 (chr1+chr2)                                | 2 (chr1+chr2)                                | 2 (chr1; linear +chr2)                       |
| <b>Contig length after circularization</b>       | 3'015'077 bp (chr1)<br>1'070'354 bp (chr 2) | 3,020,257 bp (chr 1)<br>1,070,357 bp (chr 2) | 3,011,453 bp (chr 1)<br>1,071,008 bp (chr 2) | 2,962,956 bp (chr 1)<br>1,073,557 bp (chr 2) | 3,102,362 bp (chr 1)<br>1,073,557 bp (chr 2) |
| <b>Total genome size</b>                         | 4,085,431 bp                                | 4,090,614 bp                                 | 4,082,461 bp                                 | 4,036,513 bp                                 | 4,138,826 bp                                 |
| <b>Mean coverage</b>                             | 329 x                                       | 343 x                                        | 344 x                                        | 375 x                                        | 174 x                                        |
| <b>GC content</b>                                | 47.7% (chr1)<br>46.9% (chr2)                | 47.6% (chr1)<br>46.9% (chr2)                 | 47.7% (chr1)<br>46.9% (chr2)                 | 47.7% (chr1)<br>46.9% (chr2)                 | 47.7% (chr1)<br>47.1% (chr2)                 |

Table S3. Conservation of selected quorum sensing, chitin utilization, and competence gene products among pandemic *V. cholerae* strains

| Category                                     | VC locus tag number <sup>(1)</sup><br>(gene name) | Protein identity / similarity compared to strain A1552 |                     |       |       |        |                      |
|----------------------------------------------|---------------------------------------------------|--------------------------------------------------------|---------------------|-------|-------|--------|----------------------|
|                                              |                                                   | N16961 <sup>(2)</sup>                                  | C6706               | C6709 | E7946 | P27459 | MO10                 |
| Chitin utilization & sensing                 | VC0611-VC619                                      | 100%                                                   | 100%                | 100%  | 100%  | 100%   | 100%                 |
|                                              | VC0620 (cbp)                                      | 100%                                                   | 100%                | 100%  | 100%  | 100%   | 100%                 |
|                                              | VC0622 (chiS)                                     | 100%                                                   | 100%                | 100%  | 100%  | 100%   | 100%                 |
|                                              | VC0972 (chiP)                                     | 100%                                                   | 100%                | 100%  | 100%  | 100%   | 100%                 |
|                                              | VC0994 (nagA)                                     | 100%                                                   | 100%                | 100%  | 100%  | 100%   | 100%                 |
|                                              | VC0995 (nagE)                                     | 100%                                                   | 100%                | 100%  | 100%  | 100%   | 100%                 |
|                                              | VC1073                                            | 100%                                                   | 100%                | 100%  | 100%  | 100%   | 100%                 |
|                                              | VC1280-86                                         | 100%                                                   | 100%                | 100%  | 100%  | 100%   | 100%                 |
|                                              | VC1783                                            | 100%                                                   | 100%                | 100%  | 100%  | 100%   | 100%                 |
|                                              | VC1952 (chiA-1)                                   | 100%                                                   | 100%                | 100%  | 100%  | 100%   | 100%                 |
|                                              | VCA0027 (chiA-2)                                  | 100%                                                   | 100%                | 100%  | 100%  | 100%   | 100%                 |
|                                              | VC2217                                            | 100%                                                   | 100%                | 100%  | 100%  | 100%   | 100%                 |
|                                              | VCA0140                                           | 100%                                                   | 100%                | 100%  | 100%  | 100%   | 100%                 |
|                                              | VCA0700 (chiD)                                    | 100%                                                   | 100%                | 100%  | 100%  | 100%   | 100%                 |
|                                              | VCA1025 (nagB)                                    | 100%                                                   | 100%                | 100%  | 100%  | 100%   | 100%                 |
| VC2080 (tfoS)                                | 100%                                              | 100%                                                   | 100%                | 100%  | 100%  | 100%   |                      |
| VC0534 (rpoS)                                | 100%                                              | 100%                                                   | 100%                | 100%  | 100%  | 100%   |                      |
| QS & competence regulation                   | VC0583 (hapR)                                     | frameshift mutation <sup>(3)</sup>                     | 100%                | 100%  | 100%  | 100%   | 99.5% <sup>(4)</sup> |
|                                              | VC1153 (tfoX)                                     | 100%                                                   | 100%                | 100%  | 100%  | 100%   | 100%                 |
|                                              | VC0396 (qstR)                                     | 100%                                                   | 100%                | 100%  | 100%  | 100%   | 100%                 |
|                                              | VC1021 (luxO)                                     | 100%                                                   | 100% <sup>(5)</sup> | 100%  | 100%  | 100%   | 100%                 |
|                                              | VC2614 (crp)                                      | 100%                                                   | 100%                | 100%  | 100%  | 100%   | 100%                 |
|                                              | VC2677 (cytR)                                     | 100%                                                   | 100%                | 100%  | 100%  | 100%   | 100%                 |
| DNA-uptake complex (including type IV pilus) | VC2423 (pilA)                                     | 100%                                                   | 100%                | 100%  | 100%  | 100%   | 100%                 |
|                                              | VC2424 (pilB)                                     | 100%                                                   | 100%                | 100%  | 100%  | 100%   | 100%                 |
|                                              | VC2425 (pilC)                                     | 100%                                                   | 100%                | 100%  | 100%  | 100%   | 100%                 |
|                                              | VC2426 (pilD)                                     | 100%                                                   | 100%                | 100%  | 100%  | 100%   | 100%                 |

|                                           |                       |                             |      |                                        |                            |      |                             |
|-------------------------------------------|-----------------------|-----------------------------|------|----------------------------------------|----------------------------|------|-----------------------------|
| <b>VC1612 (pilF)</b>                      | <b>VC2630 (pilQ)</b>  | 100%                        | 100% | 100%                                   | 100%                       | 100% | 100%                        |
|                                           | <b>VC2631 (pilP)</b>  | 100%                        | 100% | 100%                                   | 100%                       | 100% | 100%                        |
|                                           | <b>VC2632 (pilO)</b>  | 100%                        | 100% | 100%                                   | 100%                       | 100% | 100%                        |
|                                           | <b>VC2633 (pilN)</b>  | 100%                        | 100% | 100%                                   | 100%                       | 100% | 100%                        |
|                                           | <b>VC2634 (pilM)</b>  | 100%                        | 100% | 100%                                   | 100%                       | 100% | 100%                        |
|                                           | <b>VC1612 (pilF)</b>  | 100%                        | 100% | 100%                                   | 100%                       | 100% | 100%                        |
|                                           | <b>VC0462 (pilT)</b>  | 100%                        | 100% | 100%                                   | 100%                       | 100% | <b>99.7% <sup>(6)</sup></b> |
|                                           | <b>VC0463 (pilU)</b>  | 100%                        | 100% | 100%                                   | 100%                       | 100% | 100%                        |
|                                           | <b>VC0857</b>         | 100%                        | 100% | 100%                                   | 100%                       | 100% | 100%                        |
|                                           | <b>VC0858</b>         | 100%                        | 100% | 100%                                   | 100%                       | 100% | 100%                        |
|                                           | <b>VC0859</b>         | 100%                        | 100% | 100%                                   | 100%                       | 100% | 100%                        |
|                                           | <b>VC0860</b>         | 100%                        | 100% | 100%                                   | <b>100% <sup>(7)</sup></b> | 100% | 100%                        |
|                                           | <b>VC0861</b>         | 100%                        | 100% | 100%                                   | 100%                       | 100% | 100%                        |
| <b>DNA uptake &amp; translocation</b>     | <b>VC1917 (comEA)</b> | 100%                        | 100% | 100%                                   | 100%                       | 100% | 100%                        |
|                                           | <b>VC1879 (comEC)</b> | 100%                        | 100% | 100%                                   | 100%                       | 100% | 100%                        |
|                                           | <b>VC2719 (comF)</b>  | 100%                        | 100% | 100%                                   | 100%                       | 100% | 100%                        |
| <b>DNA protection &amp; recombination</b> | <b>VC0048 (dprA)</b>  | 100%                        | 100% | 100%                                   | 100%                       | 100% | 100%                        |
|                                           | <b>VC0543 (recA)</b>  | <b>99.7% <sup>(8)</sup></b> | 100% | 100%                                   | 100%                       | 100% | 100%                        |
|                                           | <b>VC0032 (comM)</b>  | 100%                        | 100% | <b>gene interrupted <sup>(9)</sup></b> | 100%                       | 100% | 100%                        |

(1) Locus tag numbers according to (Heidelberg *et al.*, 2000);

(2) N16961 initial genome sequence by Heidelberg *et al.*, 2000 (NC\_002505/NC\_002506) as well as re-sequenced laboratory collection strain (accession numbers CP028827/CP028828).

(3) Gene identity 99.8%; T218 missing in *hapR* of N16961 causing frameshift and shorten ORF to 241bp instead of full-length gene of 612 bp in A1552.

(4) See main text for information on *hapR* defect in strain MO10, which encodes HapR[R12L], confirming a previous study (Joelsson *et al.*, 2006).

(5) *luxO* correct in the old version of strain C6706 (still Str<sup>S</sup>) used in this study; several laboratories work with domesticated version of C6706 that carries *luxO*\* GOF mutation encoding LuxO[G333S]; (Stutzmann and Blokesch, 2016).

(6) *pilT* in newly sequenced genome of MO10 strain (accession numbers CP060094/CP060095) carries mutation in *pilT* encoding PilT[R206S], as we had previously reported; (Adams *et al.*, 2019b).

(7) Frameshift mutation in new genome sequence of strain E7946 (accession numbers CP047303/ CP047304); shown to be a sequencing artifact by Sanger sequencing.

(8) Strain N16961 harbors a mutation in *recA* leading the an amino acid exchange C305Y. We confirmed that this change is not based on a sequencing artifact but also present in the original N16961 sequence (Heidelberg *et al.*, 2000). It should be noted that the ORF annotation is incorrect in the original genome sequence rendering the RecA protein 58 amino acids longer at its N-terminus.

(9) See main text for information on *comM* interruption in strain C6709.

## Supporting References

- Adams, D.W., Stutzmann, S., Stoudmann, C., and Blokesch, M. (2019a) DNA-uptake pili of *Vibrio cholerae* are required for chitin colonization and capable of kin recognition via sequence-specific self-interaction. *Nat Microbiol* **4**: 1545-1557.
- Adams, D.W., Pereira, J.M., Stoudmann, C., Stutzmann, S., and Blokesch, M. (2019b) The type IV pilus protein PilU functions as a PilT-dependent retraction ATPase. *PLoS Genet* **15**: e1008393.
- Antonova, E.S., and Hammer, B.K. (2011) Quorum-sensing autoinducer molecules produced by members of a multispecies biofilm promote horizontal gene transfer to *Vibrio cholerae*. *FEMS Microbiol Lett* **322**: 68-76.
- Bao, Y., Lies, D.P., Fu, H., and Roberts, G.P. (1991) An improved Tn7-based system for the single-copy insertion of cloned genes into chromosomes of Gram-negative bacteria. *Gene* **109**: 167-168.
- Beaber, J.W., Hochhut, B., and Waldor, M.K. (2002) Genomic and functional analyses of SXT, an integrating antibiotic resistance gene transfer element derived from *Vibrio cholerae*. *J Bacteriol* **184**: 4259-4269.
- Dalia, A.B. (2016) RpoS is required for natural transformation of *Vibrio cholerae* through regulation of chitinases. *Environ Microbiol* **18**: 3758-3767.
- De Souza Silva, O., and Blokesch, M. (2010) Genetic manipulation of *Vibrio cholerae* by combining natural transformation with FLP recombination. *Plasmid* **64**: 186-195.
- Heidelberg, J.F., Eisen, J.A., Nelson, W.C., Clayton, R.A., Gwinn, M.L., Dodson, R.J. *et al.* (2000) DNA sequence of both chromosomes of the cholera pathogen *Vibrio cholerae*. *Nature* **406**: 477-483.
- Jaskólska, M., Stutzmann, S., Stoudmann, C., and Blokesch, M. (2018) QstR-dependent regulation of natural competence and type VI secretion in *Vibrio cholerae*. *Nucleic Acids Res* **46**: 10619-10634.
- Joelsson, A., Liu, Z., and Zhu, J. (2006) Genetic and phenotypic diversity of quorum-sensing systems in clinical and environmental isolates of *Vibrio cholerae*. *Infect Immun* **74**: 1141-1147.
- Lo Scudato, M., and Blokesch, M. (2012) The regulatory network of natural competence and transformation of *Vibrio cholerae*. *PLoS Genet* **8**: e1002778.
- Marvig, R.L., and Blokesch, M. (2010) Natural transformation of *Vibrio cholerae* as a tool-optimizing the procedure. *BMC Microbiol* **10**: 155.
- Matthey, N., Drebes Dörr, N.C., and Blokesch, M. (2018) Long-Read-Based Genome Sequences of Pandemic and Environmental *Vibrio cholerae* Strains. *Microbiol Resour Announc* **7**: e01574-01518.
- Meibom, K.L., Blokesch, M., Dolganov, N.A., Wu, C.-Y., and Schoolnik, G.K. (2005) Chitin induces natural competence in *Vibrio cholerae*. *Science* **310**: 1824-1827.
- Meibom, K.L., Li, X.B., Nielsen, A.T., Wu, C.Y., Roseman, S., and Schoolnik, G.K. (2004) The *Vibrio cholerae* chitin utilization program. *Proc Natl Acad Sci USA* **101**: 2524-2529.
- Metzger, L.C., Stutzmann, S., Scignari, T., Van der Henst, C., Matthey, N., and Blokesch, M. (2016) Independent Regulation of Type VI Secretion in *Vibrio cholerae* by TfoX and TfoY. *Cell Rep* **15**: 951-958.
- Miller, V.L., DiRita, V.J., and Mekalanos, J.J. (1989) Identification of *toxS*, a regulatory gene whose product enhances ToxR-mediated activation of the cholera toxin promoter. *J Bacteriol* **171**: 1288-1293.
- Müller, J., Miller, M.C., Nielsen, A.T., Schoolnik, G.K., and Spormann, A.M. (2007) *vpsA*- and *luxO*-independent biofilms of *Vibrio cholerae*. *FEMS Microbiol Lett* **275**: 199-206.

- Nielsen, A.T., Dolganov, N.A., Otto, G., Miller, M.C., Wu, C.Y., and Schoolnik, G.K. (2006) RpoS controls the *Vibrio cholerae* mucosal escape response. *PLoS Pathog* **2**: e109.
- Pearson, G.D., Woods, A., Chiang, S.L., and Mekalanos, J.J. (1993) CTX genetic element encodes a site-specific recombination system and an intestinal colonization factor. *Proc Natl Acad Sci USA* **90**: 3750-3754.
- Simon, R., Priefer, U., and Pühler, A. (1983) A broad host range mobilization system for *in vivo* genetic engineering: transposon mutagenesis in Gram negative bacteria. *Nat Biotechnol* **1**: 784-791.
- Stutzmann, S., and Blokesch, M. (2016) Circulation of a Quorum-Sensing-Impaired Variant of *Vibrio cholerae* Strain C6706 Masks Important Phenotypes. *mSphere* **1**: e00098-16.
- Suckow, G., Seitz, P., and Blokesch, M. (2011) Quorum sensing contributes to natural transformation of *Vibrio cholerae* in a species-specific manner. *J Bacteriol* **193**: 4914-4924.
- Van der Henst, C., Vanhove, A.S., Drebes Dörr, N.C., Stutzmann, S., Stoudmann, C., Clerc, S. *et al.* (2018) Molecular insights into *Vibrio cholerae*'s intra-amoebal host-pathogen interactions. *Nature Commun* **9**: 3460.
- Wachsmuth, I.K., Evins, G.M., Fields, P.I., Olsvik, O., Popovic, T., Bopp, C.A. *et al.* (1993) The molecular epidemiology of cholera in Latin America. *J Infect Dis* **167**: 621-626.
- Waldor, M.K., and Mekalanos, J.J. (1994) ToxR regulates virulence gene expression in non-O1 strains of *Vibrio cholerae* that cause epidemic cholera. *Infect Immun* **62**: 72-78.
- Yanisch-Perron, C., Vieira, J., and Messing, J. (1985) Improved M13 phage cloning vectors and host strains: nucleotide sequences of the M13mp18 and pUC19 vectors. *Gene* **33**: 103-119.
- Yildiz, F.H., and Schoolnik, G.K. (1998) Role of *rpoS* in stress survival and virulence of *Vibrio cholerae*. *J Bacteriol* **180**: 773-784.
